# Supplementary material for: Inhibition of murine hepatoma tumor growth by cryptotanshinone involves TLR7-dependent activation of macrophages and induction of adaptive antitumor immune defenses
Source: Cancer Immunol Immunother. 2019 Jun 3;68(7):1073–85. doi: 10.1007/s00262-019-02338-4 (PMC6584221; doi:10.1007/s00262-019-02338-4)
Supplement: Supplementary file 1 — Supplementary material 1 (PDF 780 kb) [file 262_2019_2338_MOESM1_ESM.pdf]

## Supplemental figures and table

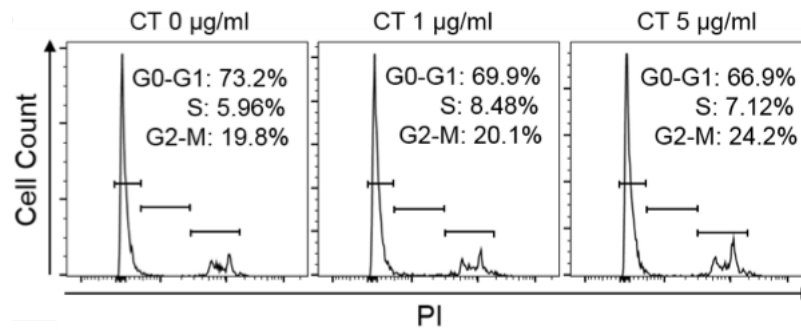

**sFig. 1. Cell cycle analysis of CT-treated Hepa-6 cells.** Synchronized Hepa1-6 cells incubated with CT for 48 h in a CO<sub>2</sub> incubator were stained with PI and subjected to cell cycle analysis by flow cytometry.

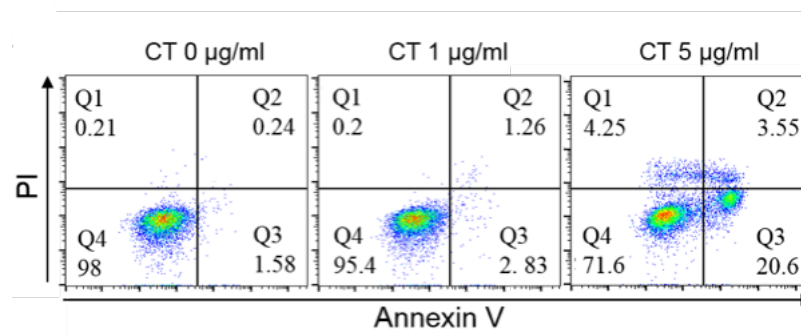

**sFig. 2. Determination of cell death of CT-treated Hepa1-6 cells.** Hepa1-6 cells seeded in a 12-well plate at  $3 \times 10^5$ /ml/well were incubated with indicated concentrations of CT for 48 h in a CO<sub>2</sub> incubator and before they were harvested, and stained with Annexin V and PI, and analyzed by flow cytometry.

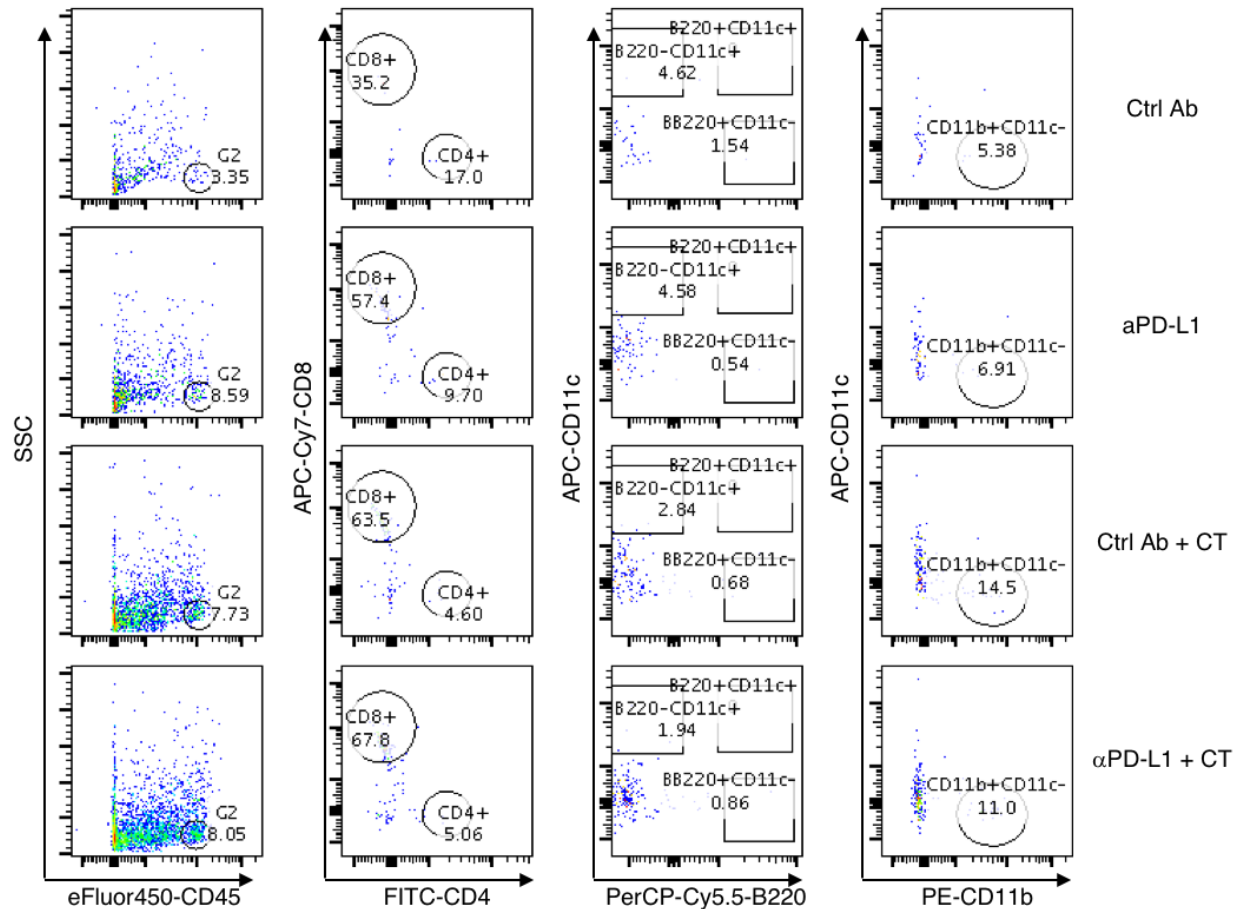

**sFig. 3. Flow cytometry determination of leukocyte subsets in the tumors of treated Hepa1-6-bearing mice.** Tumors removed from Hepa1-6-bearing C57BL/6 mice 24 h after the 3<sup>rd</sup> treatment with CT (100 µg/mouse) and anti-PD-L1 (αPD-L1, 10 µg/mouse) alone or in combination were enzymatically dissociated into single cell suspension. The single cell suspensions (1x10<sup>6</sup>/sample) were immunostained with labeled antibodies against mouse CD45, CD4, CD8, CD11b, CD11c, and B220. CD4 T cells, CD8 cells, B cells (B220<sup>+</sup>/CD11c<sup>-</sup>), cDCs (CD11c<sup>+</sup>/B220<sup>-</sup>), pDCs (CD11c<sup>+</sup>/B220<sup>+</sup>) and macrophage (Mφ, CD11b<sup>+</sup>/CD11c<sup>-</sup>) were analyzed by gating on CD45<sup>+</sup> populations. Shown are plots of one mouse from each treatment group.

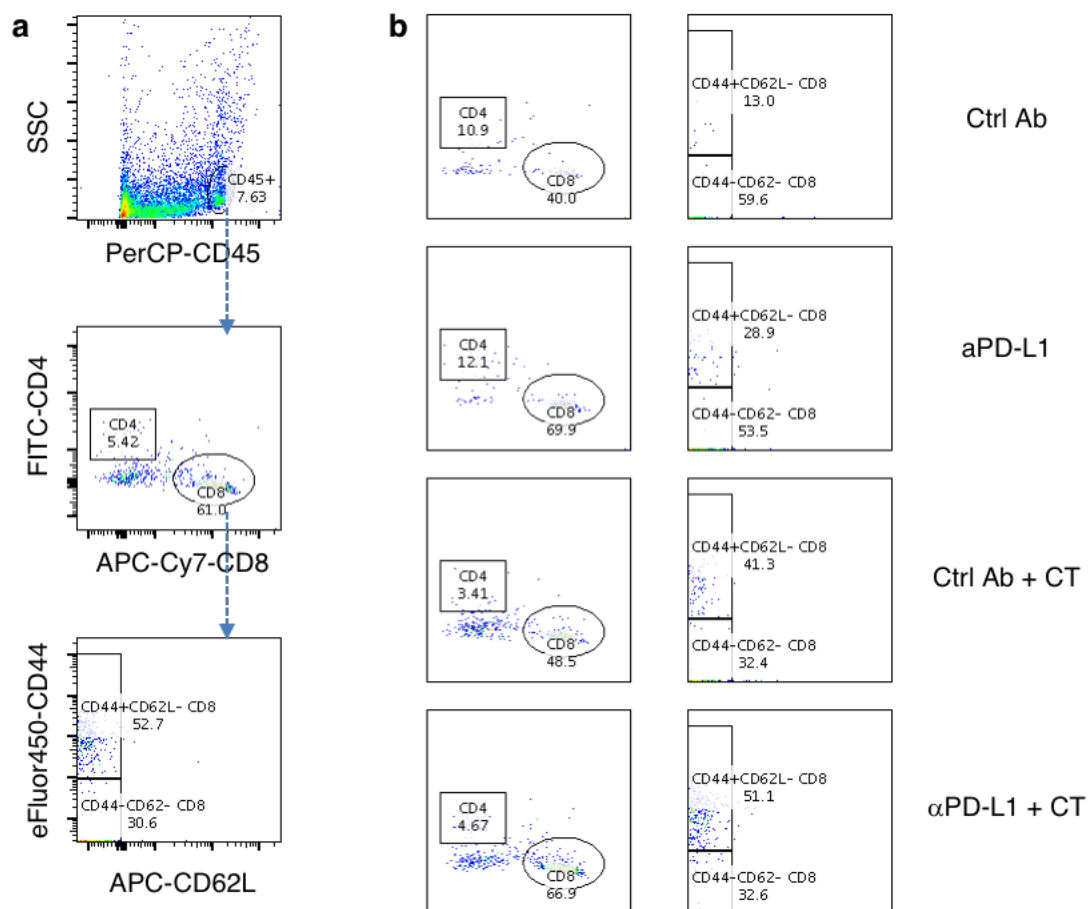

**sFig. 4. Flow cytometry analysis of effector/memory (CD62L<sup>-</sup>/CD44<sup>high</sup>) CD8 T cells in the tumors of treated Hepa1-6 Hepa1-6-bearing mice.** removed from Hepa1-6-bearing C57BL/6 mice 24 h after the 3<sup>rd</sup> treatment with CT (100  $\mu$ g/mouse) and anti-PD-L1 ( $\alpha$ PD-L1, 10  $\mu$ g/mouse) alone or in combination were enzymatically dissociated into single cell suspension. The single cell suspensions ( $1 \times 10^6$ /sample) were immunostained with labeled antibodies against mouse CD45, CD8, CD44, and CD62L. Shown are the gating (**a**) and plots of one mouse from each treatment group (**b**).

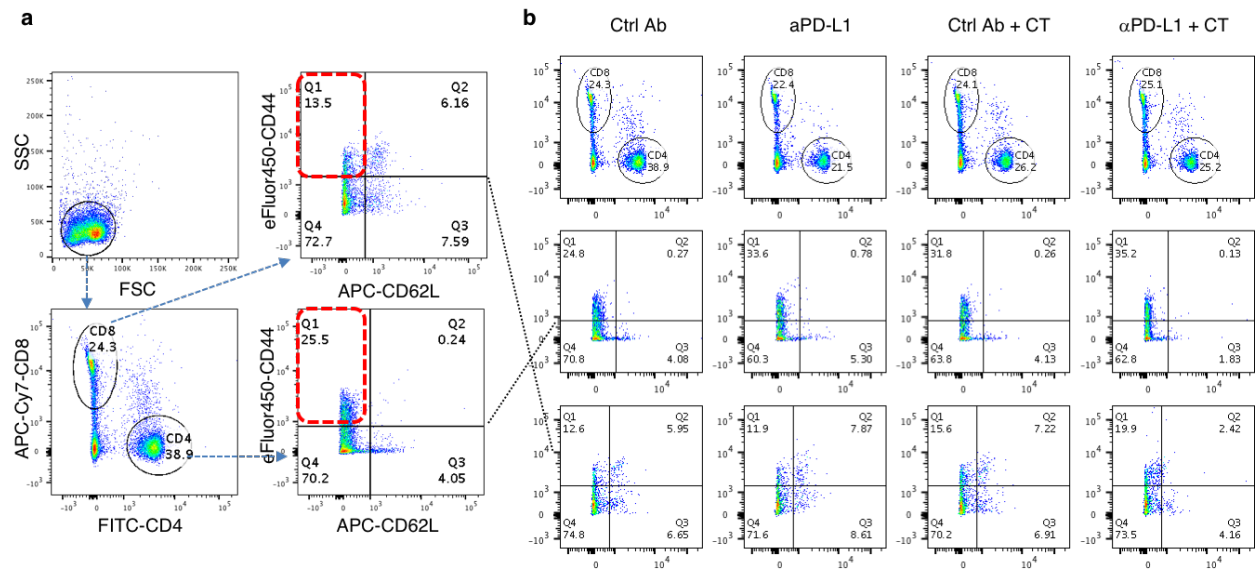

**sFig. 5. Flow cytometry measurement of effector/memory (CD62L<sup>-</sup>/CD44<sup>high</sup>) CD4 and CD8 T cells in the tumor draining lymph nodes of treated Hepa1-6-bearing mice.** Draining lymph nodes (dLN) were removed from Hepa1-6-bearing C57BL/6 mice 24 h after the 3<sup>rd</sup> treatment with CT (100  $\mu$ g/mouse) and anti-PD-L1 ( $\alpha$ PD-L1, 10  $\mu$ g/mouse) alone or in combination and immunostained with labeled antibodies against mouse CD4, CD8, CD44, and CD62L. Shown are the gating (**a**) and plots of one mouse from each treatment group (**b**).

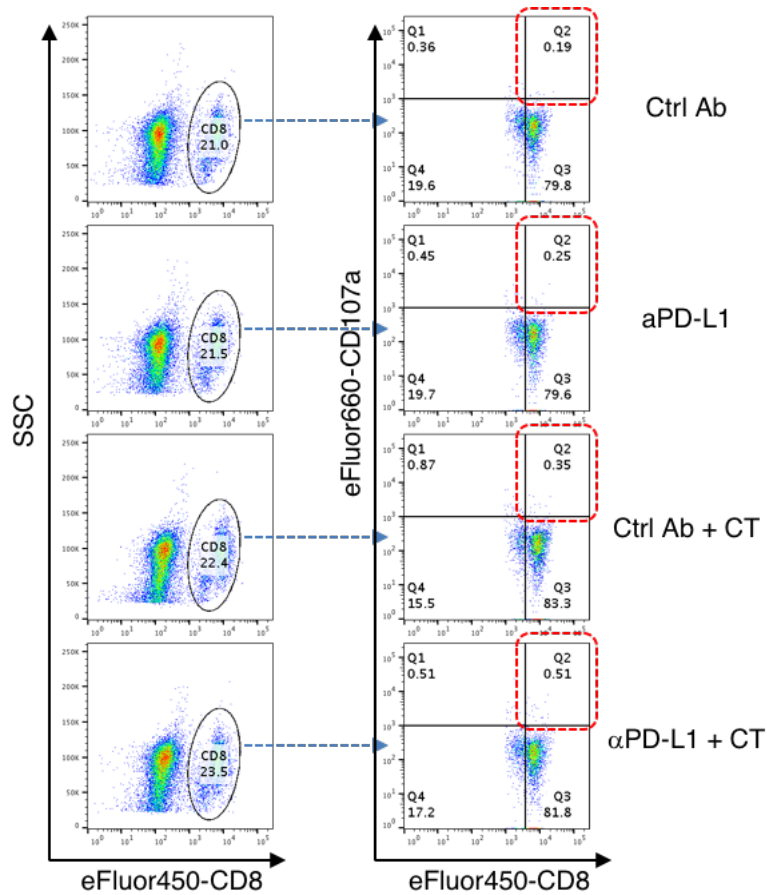

**sFig. 6. Functional CTLs in the draining lymph nodes of treated Hepa1-6-bearing mice.** Draining lymph nodes (dLN) removed from Hepa1-6-bearing C57BL/6 mice 24 h after the 3<sup>rd</sup> treatment with CT (100 µg/mouse) and anti-PD-L1 (αPD-L1, 10 µg/mouse) alone or in combination were used to make single cell suspension. Subsequently, dLN cells were seeded into a monolayer of Hepa1-6 in a 48-well plate at a ratio of 20:1 (dLN cell:Hepa1-6), cocultured for 18 h in a CO<sub>2</sub> incubator, harvested, stained with eFluor450-CD8 and eFluor660-CD107a, and analyzed by flow cytometry. Shown are the gating and plots of one mouse of each treatment group.

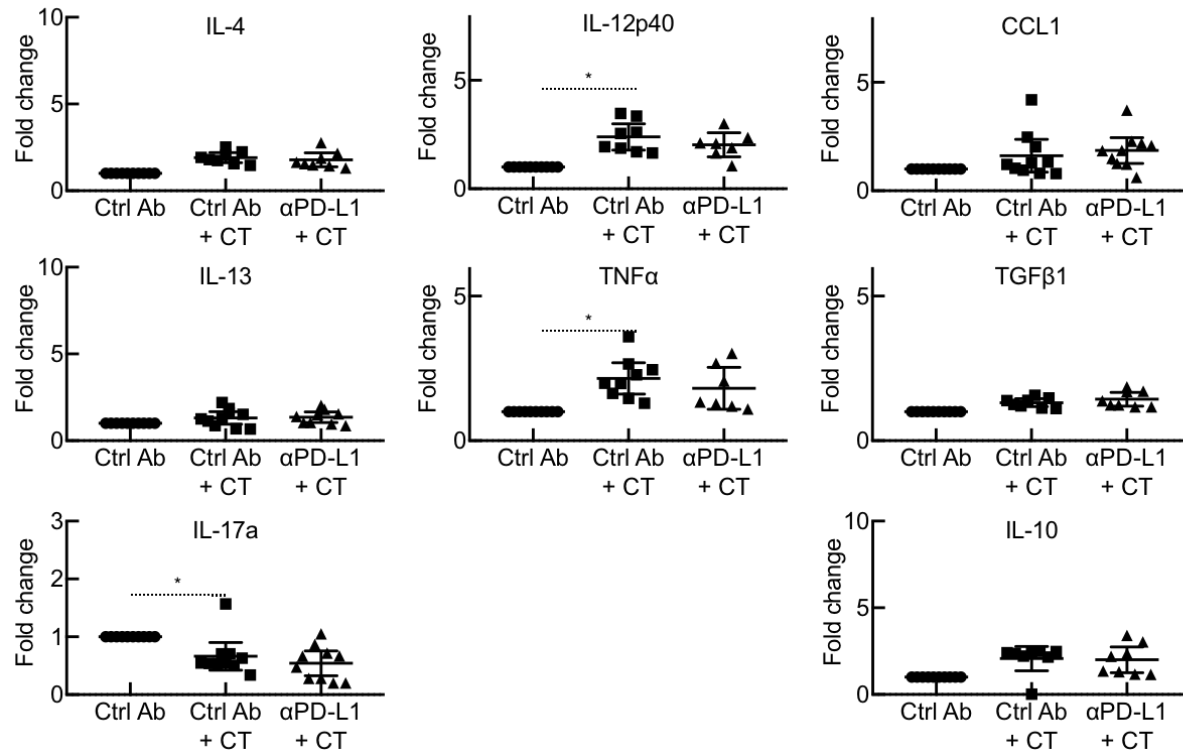

**sFig. 7. Cytokines expressed in Hepa1-6 tumors in response to treatment.** RNAs were extracted from Hepa1-6 tumors resected 24 h after the 3<sup>rd</sup> treatment with CT (100  $\mu$ g/mouse) and anti-PD-L1 ( $\alpha$ PD-L1, 10  $\mu$ g/mouse) alone or in combination. The expression of target genes was measured by qPCR, analyzed using Qiagen website, and presented as fold change. \* $p < 0.001$  ( $n = 7 \sim 10$ ).

**sTable 1. qPCR primers used in the current study**

| <b>Primer Name</b>    | <b>Company</b> | <b>Primer Number</b> |
|-----------------------|----------------|----------------------|
| Mouse CXCL9           | Qiagen         | PPM029723-200        |
| Mouse CXCL10          | Qiagen         | PPM02978E-200        |
| Mouse CXCL11          | Qiagen         | PPM03192C-200        |
| Mouse CCL1            | Qiagen         | PPM03138C-200        |
| Mouse IFN $\alpha$ 11 | Qiagen         | PPM03050B-200        |
| Mouse IFN $\beta$     | Qiagen         | PPM03594C-200        |
| Mouse TGF $\beta$ 1   | Qiagen         | PPM02991B-200        |
| Mouse Perforin        | Qiagen         | PPM34456B-200        |
| Mouse Granzyme B      | Qiagen         | PPM05303F-200        |
| Mouse IFN $\gamma$    | Qiagen         | PPM03121A-200        |
| Mouse IL-17a          | Qiagen         | PPM03023A-200        |
| Mouse iNOS            | IDT            | 199797838            |
| Mouse IL-4            | Qiagen         | PPM03013F-200        |
| Mouse IL-10           | Qiagen         | PPM03017C-200        |
| Mouse IL-13           | IDT            | 135048668            |
| Mouse TNF $\alpha$    | IDT            | 155731475            |
| Mouse IL-12p40        | IDT            | 155731469            |
| Mouse GAPDH           | IDT            | 135048676            |
